# Supplementary material
Source: MDPI journal article supplement (https://www.mdpi.com/2079-9276/12/9/99)
Supplement: s1 [file s1]

## Supplementary materials

Table S1. Spatial differentiation of the agrotechnical and financial factors (F) of agricultural productivity in Poland.

| No   | Voivodships         | Agrotechnical and financial factors (F) of agricultural productivity |      |      |      |      |       |       |      |
|------|---------------------|----------------------------------------------------------------------|------|------|------|------|-------|-------|------|
|      |                     | F.1                                                                  | F.2  | F.3  | F.4  | F.5  | F.6   | F.7   | F.8  |
| 1    | Zachodniopomorskie  | 67.5                                                                 | 36.0 | 16.2 | 12.3 | 64.5 | 74.6  | 392.0 | 85.8 |
| 2    | Pomorskie           | 62.2                                                                 | 41.0 | 16.6 | 2.8  | 63.7 | 87.8  | 552.0 | 57.2 |
| 3    | Warmińsko-mazurskie | 66.0                                                                 | 39.2 | 30.7 | 11.5 | 60.4 | 69.5  | 565.0 | 58.3 |
| 4    | Lubuskie            | 62.3                                                                 | 27.7 | 22.3 | 11.1 | 69.8 | 62.2  | 422.0 | 91.3 |
| 5    | Wielkopolskie       | 64.8                                                                 | 58.3 | 13.6 | 1.7  | 70.4 | 88.9  | 945.0 | 46.7 |
| 6    | Kujawsko-pomorskie  | 71.0                                                                 | 61.1 | 10.6 | 0.6  | 65.1 | 107.7 | 913.0 | 45.4 |
| 7    | Mazowieckie         | 59.9                                                                 | 60.4 | 29.7 | 1.9  | 70.6 | 67.8  | 602.0 | 37.5 |
| 8    | Podlaskie           | 55.0                                                                 | 53.1 | 38.0 | 4.9  | 62.6 | 60.2  | 713.0 | 37.8 |
| 9    | Dolnośląskie        | 74.9                                                                 | 42.9 | 14.6 | 3.6  | 70.0 | 97.0  | 247.0 | 63.4 |
| 10   | Łódzkie             | 61.9                                                                 | 54.6 | 15.3 | 1.0  | 76.4 | 73.0  | 390.0 | 28.1 |
| 11   | Lubelskie           | 74.1                                                                 | 56.3 | 16.1 | 2.0  | 69.3 | 79.8  | 301.0 | 36.3 |
| 12   | Opolskie            | 81.4                                                                 | 51.9 | 7.7  | 0.7  | 71.8 | 111.6 | 383.0 | 50.1 |
| 13   | Śląskie             | 64.2                                                                 | 30.2 | 20.7 | 0.9  | 76.7 | 69.2  | 289.0 | 45.7 |
| 14   | Świętokrzyskie      | 69.3                                                                 | 40.2 | 19.8 | 1.8  | 73.5 | 57.2  | 413.0 | 21.0 |
| 15   | Małopolskie         | 69.3                                                                 | 36.7 | 36.7 | 1.5  | 73.6 | 43.9  | 229.0 | 38.7 |
| 16   | Podkarpackie        | 70.4                                                                 | 30.7 | 29.5 | 2.3  | 75.8 | 41.8  | 143.0 | 34.9 |
| Mean |                     | 67.1                                                                 | 45.0 | 21.1 | 3.8  | 69.6 | 74.5  | 468.7 | 48.6 |

Table S2. Spatial differentiation of the KPIs of production (P), environmental (E) and cultural (C) ecosystem services.

| No   | Voivodeships        | KPIs selected for assessing the level of production (P), environmental (E) and cultural (C) ecosystem services |      |     |     |      |     |      |      |      |      |      |     |     |      |     |      |
|------|---------------------|----------------------------------------------------------------------------------------------------------------|------|-----|-----|------|-----|------|------|------|------|------|-----|-----|------|-----|------|
|      |                     | P.1                                                                                                            | P.2  | P.3 | P.4 | E.1  | E.2 | E.3  | E.4  | E.5  | E.6  | E.7  | C.1 | C.2 | C.3  | C.4 | C.5  |
| 1    | Zachodniopomorskie  | 41.3                                                                                                           | 15.3 | 4.3 | 3.5 | 72.0 | 1.9 | 34.0 | 79.4 | 23.5 | 40.0 | 22.0 | 1.1 | 0.5 | 4.7  | 2.9 | 14.5 |
| 2    | Pomorskie           | 41.8                                                                                                           | 40.6 | 5.2 | 5.7 | 51.0 | 2.0 | 34.4 | 36.3 | 23.3 | 42.0 | 18.0 | 0.7 | 0.5 | 5.7  | 1.8 | 8.8  |
| 3    | Warmińsko-mazurskie | 39.9                                                                                                           | 47.9 | 5.1 | 4.7 | 52.0 | 2.1 | 45.1 | 41.9 | 49.3 | 34.0 | 14.0 | 1.4 | 0.3 | 4.0  | 5.7 | 22.7 |
| 4    | Lubuskie            | 37.1                                                                                                           | 21.6 | 3.0 | 4.1 | 35.0 | 2.1 | 42.7 | 61.9 | 21.4 | 58.0 | 25.0 | 0.9 | 0.4 | 2.9  | 0.9 | 4.6  |
| 5    | Wielkopolskie       | 41.1                                                                                                           | 85.6 | 7.4 | 9.3 | 48.0 | 2.3 | 48.8 | 9.1  | 28.7 | 76.0 | 48.0 | 0.7 | 0.2 | 1.0  | 3.8 | 12.5 |
| 6    | Kujawsko-pomorskie  | 44.4                                                                                                           | 55.5 | 7.2 | 6.4 | 40.0 | 1.9 | 34.3 | 57.8 | 23.3 | 40.0 | 33.0 | 0.8 | 0.5 | 3.6  | 1.5 | 5.4  |
| 7    | Mazowieckie         | 33.0                                                                                                           | 57.9 | 6.0 | 8.4 | 78.0 | 2.3 | 56.8 | 48.9 | 26.6 | 58.0 | 29.0 | 0.7 | 0.1 | 1.0  | 1.7 | 6.0  |
| 8    | Podlaskie           | 30.9                                                                                                           | 83.9 | 6.2 | 5.5 | 36.0 | 2.4 | 57.7 | 2.5  | 38.2 | 48.0 | 31.0 | 1.0 | 0.6 | 5.3  | 6.0 | 21.3 |
| 9    | Dolnośląskie        | 49.3                                                                                                           | 12.9 | 4.6 | 4.0 | 41.0 | 2.1 | 33.6 | 49.1 | 30.8 | 11.0 | 8.0  | 1.7 | 1.2 | 20.2 | 5.7 | 22.1 |
| 10   | Łódzkie             | 35.2                                                                                                           | 59.8 | 6.0 | 7.0 | 49.0 | 2.7 | 70.0 | 55.8 | 36.4 | 18.0 | 15.0 | 1.2 | 0.5 | 3.9  | 4.0 | 21.1 |
| 11   | Lubelskie           | 42.7                                                                                                           | 28.9 | 5.5 | 5.3 | 60.0 | 2.7 | 61.3 | 42.9 | 32.5 | 72.0 | 48.0 | 0.3 | 0.4 | 1.0  | 2.0 | 6.3  |
| 12   | Opolskie            | 55.8                                                                                                           | 30.3 | 7.2 | 4.9 | 60.0 | 1.8 | 32.8 | 33.3 | 28.4 | 47.0 | 33.0 | 0.6 | 0.3 | 3.1  | 3.8 | 13.2 |
| 13   | Śląskie             | 42.1                                                                                                           | 35.8 | 6.0 | 7.5 | 53.0 | 2.2 | 48.5 | 50.3 | 31.4 | 22.0 | 8.0  | 1.6 | 1.4 | 23.6 | 6.5 | 22.8 |
| 14   | Świętokrzyskie      | 31.6                                                                                                           | 32.4 | 4.2 | 6.8 | 59.0 | 2.0 | 37.4 | 93.7 | 25.8 | 40.0 | 28.0 | 1.1 | 0.1 | 1.3  | 4.7 | 20.0 |
| 15   | Małopolskie         | 40.7                                                                                                           | 33.3 | 3.5 | 5.1 | 56.0 | 2.3 | 54.7 | 36.0 | 35.6 | 20.0 | 11.0 | 1.6 | 0.6 | 7.9  | 4.7 | 16.5 |
| 16   | Podkarpackie        | 40.7                                                                                                           | 15.8 | 4.1 | 2.9 | 53.3 | 2.2 | 47.9 | 46.2 | 30.3 | 41.9 | 24.9 | 1.0 | 0.5 | 5.8  | 3.8 | 14.6 |
| Mean |                     | 40.5                                                                                                           | 41.1 | 5.3 | 5.7 | 62.0 | 3.0 | 74.1 | 39.5 | 29.8 | 45.0 | 28.0 | 0.9 | 0.5 | 3.7  | 4.9 | 16.0 |
